# Supplementary material
Source: PubMed Central journal article supplement (PMC4862569)

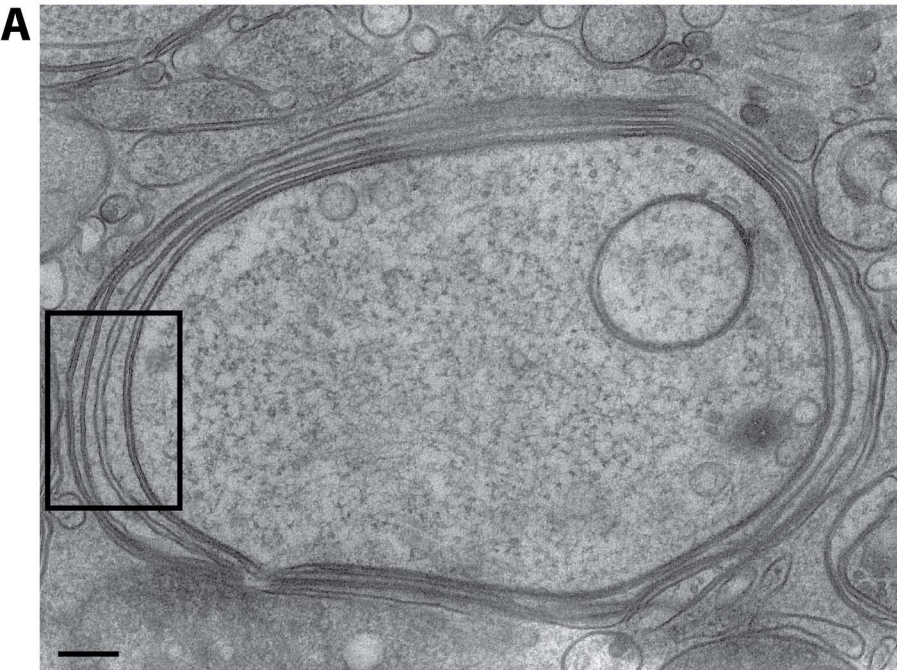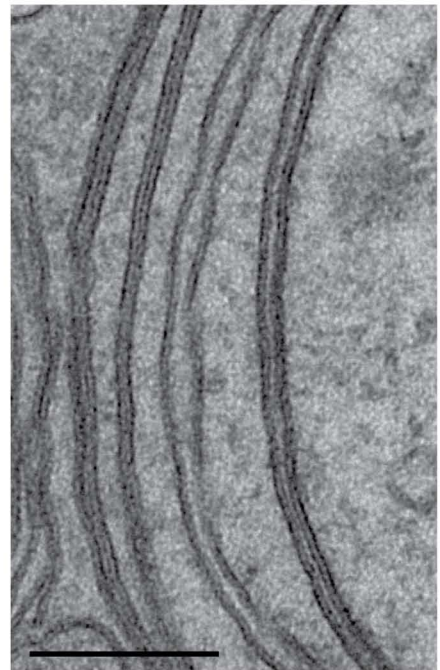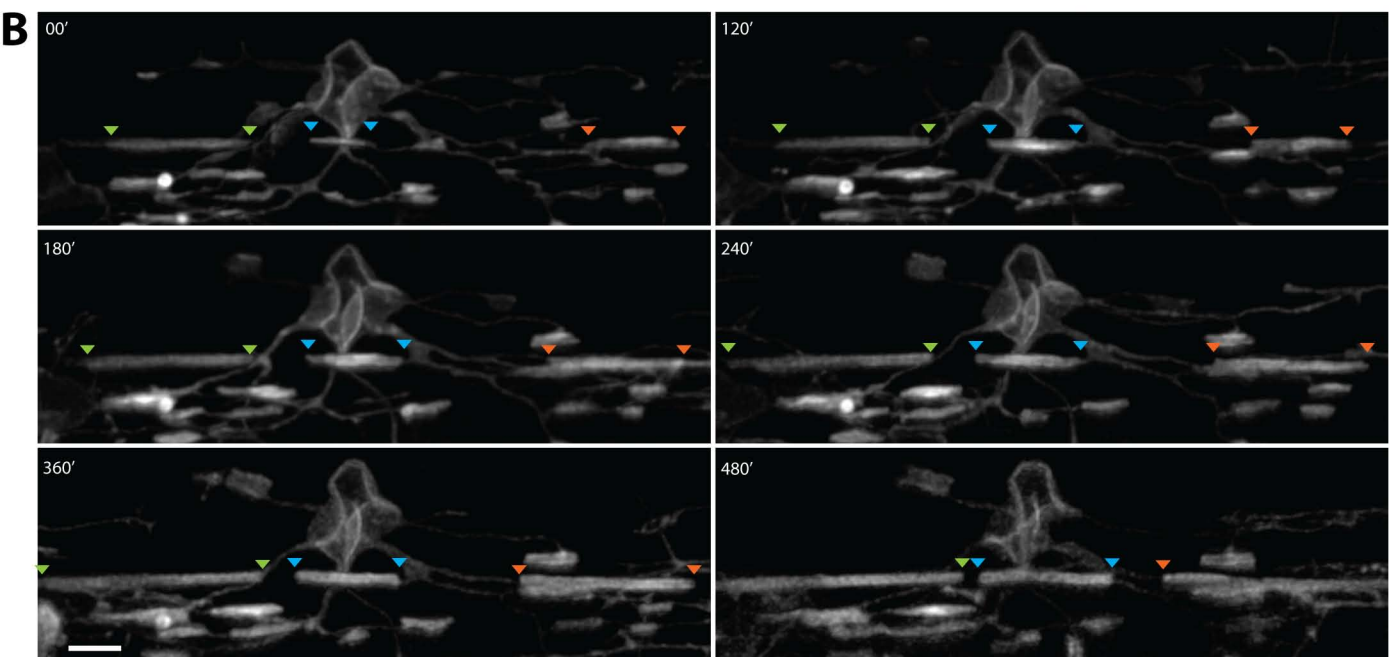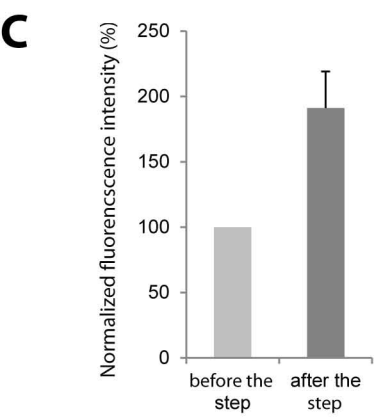

**A**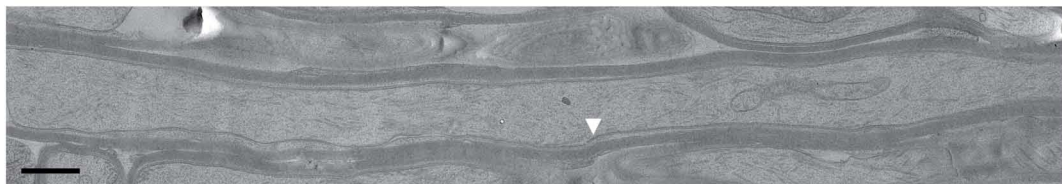**B**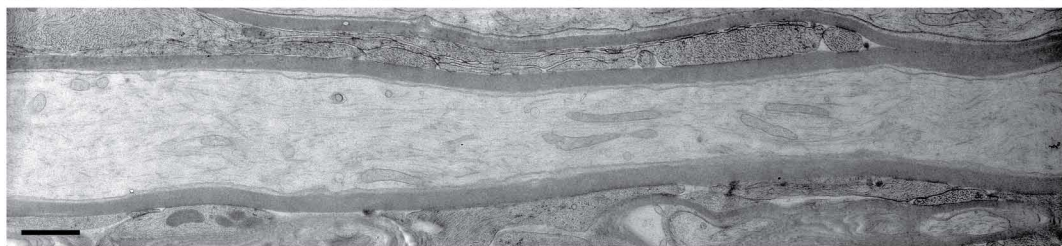**D**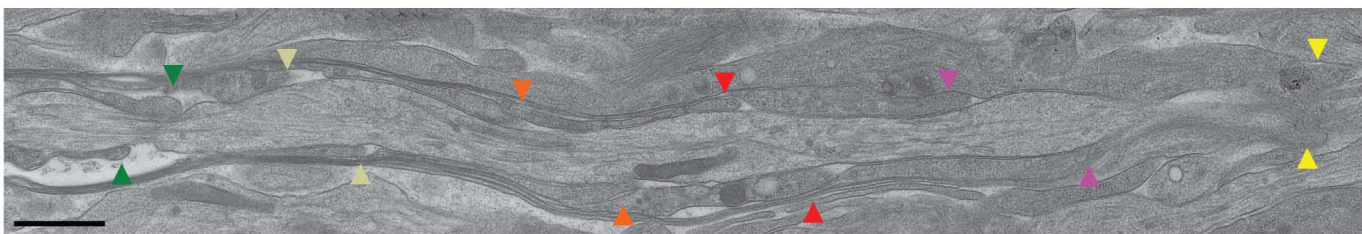**E**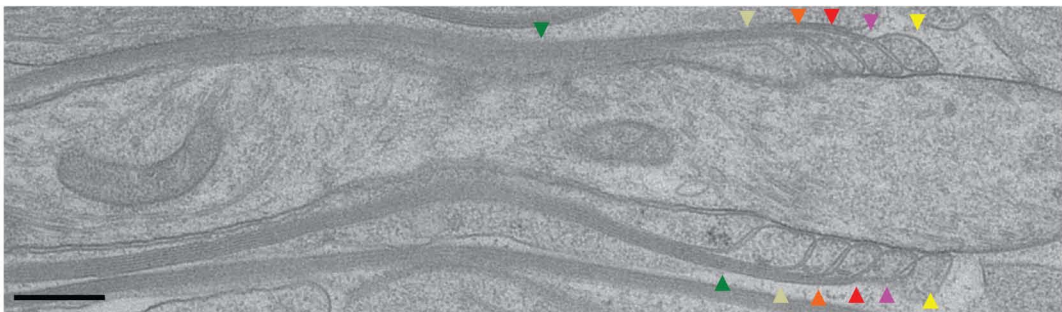**F**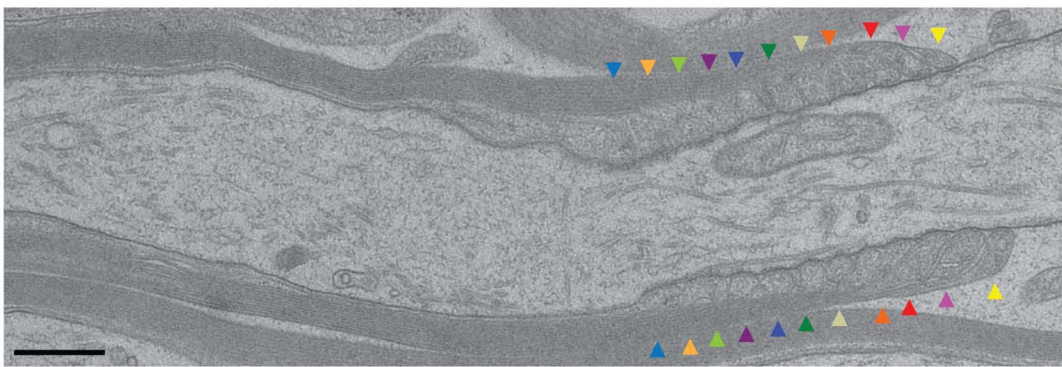**C**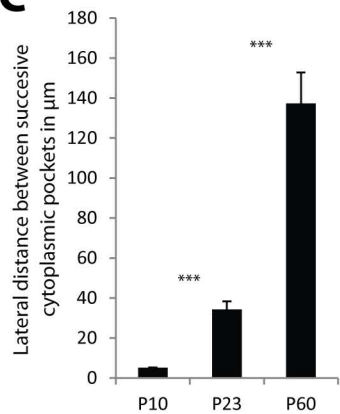**G**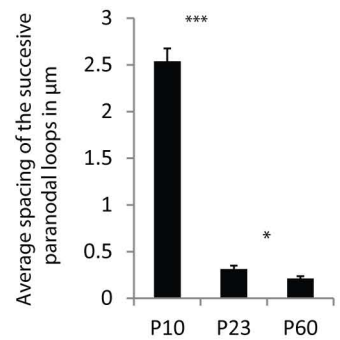



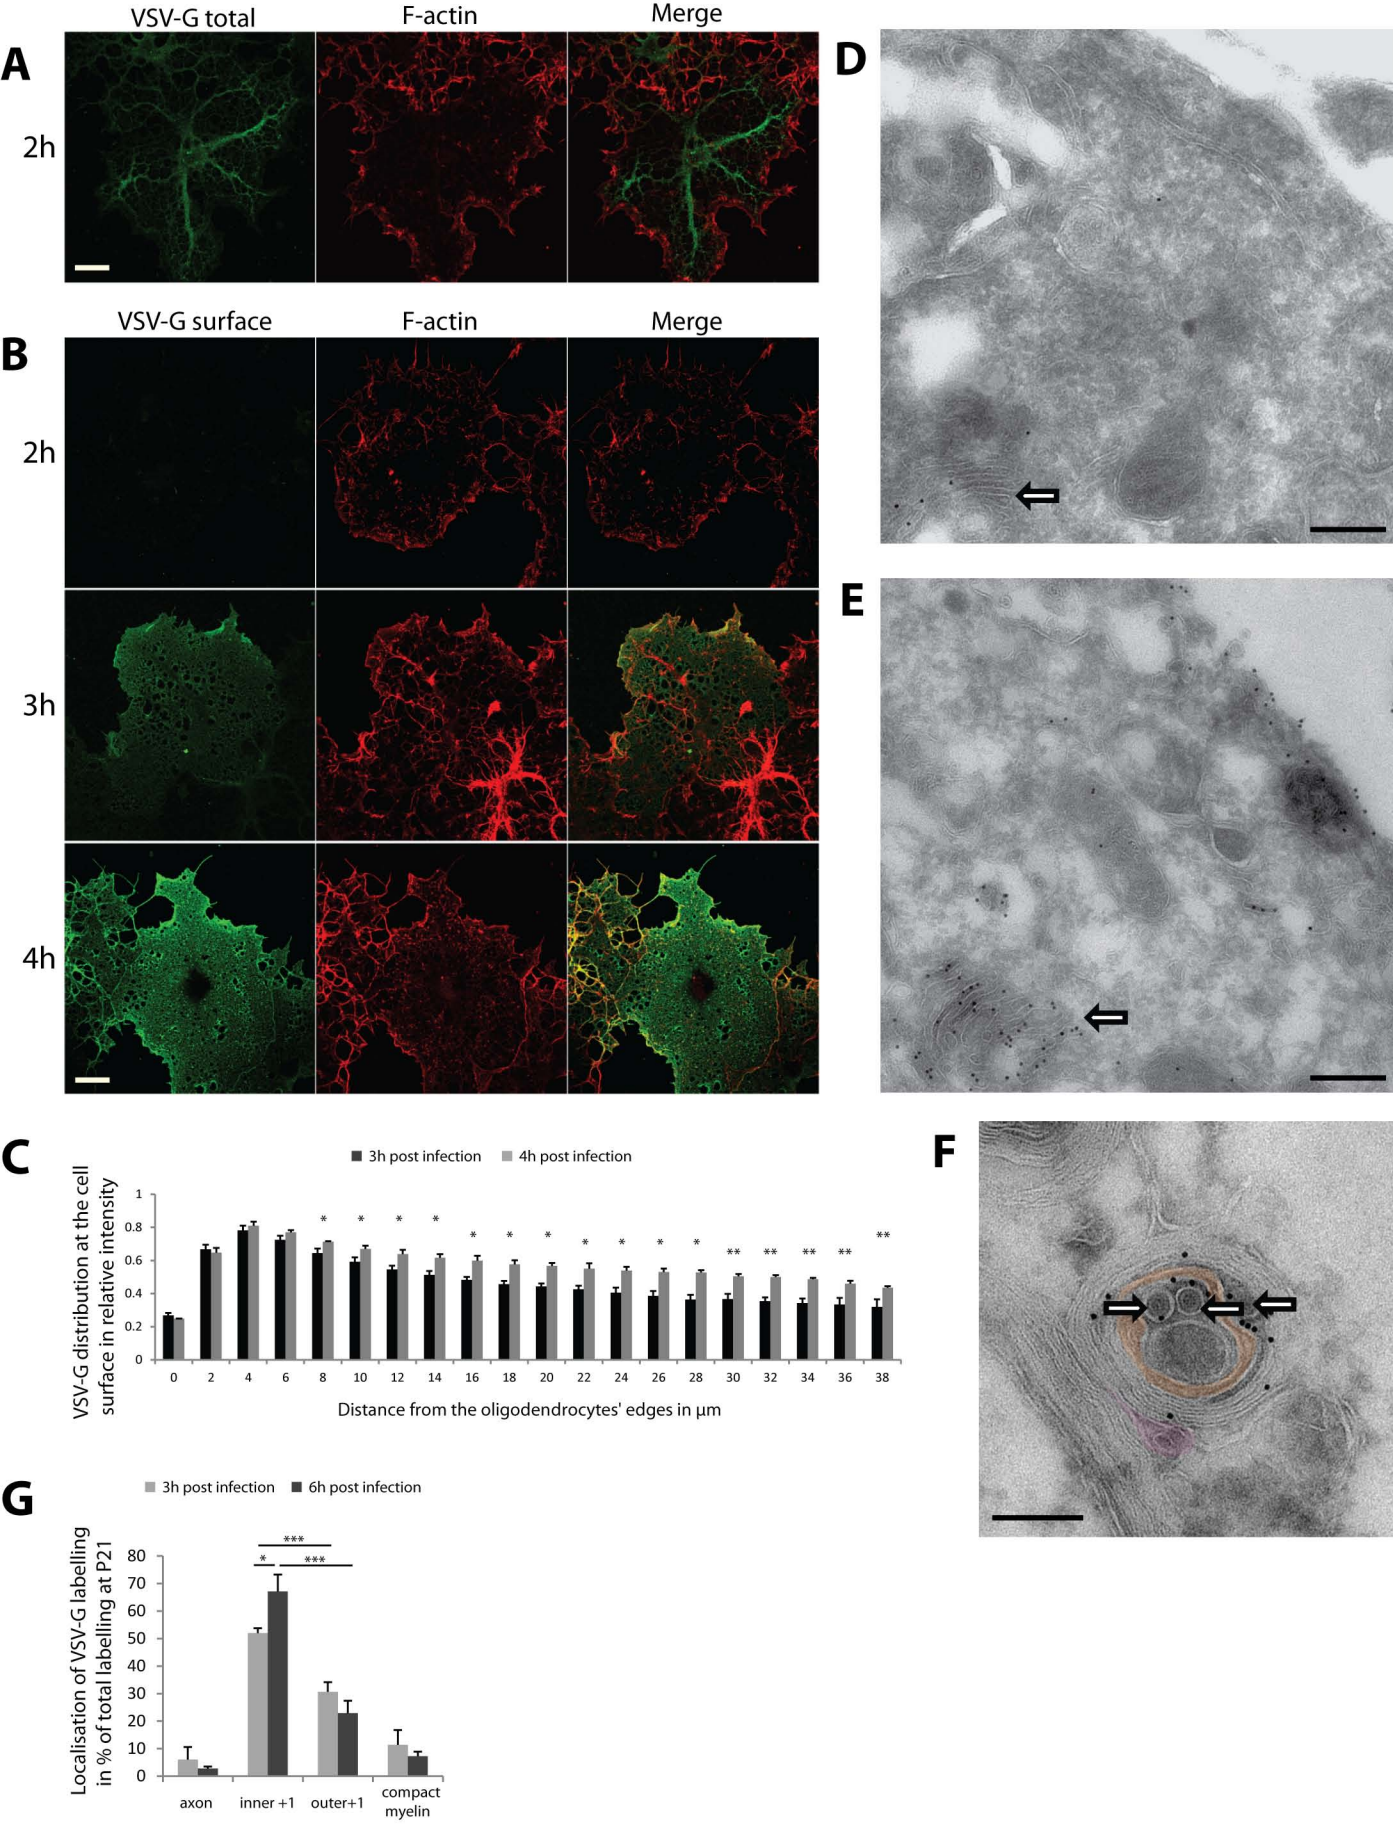



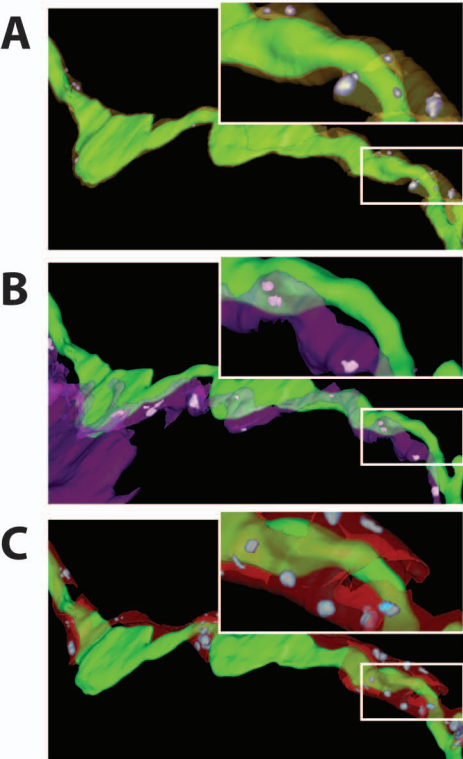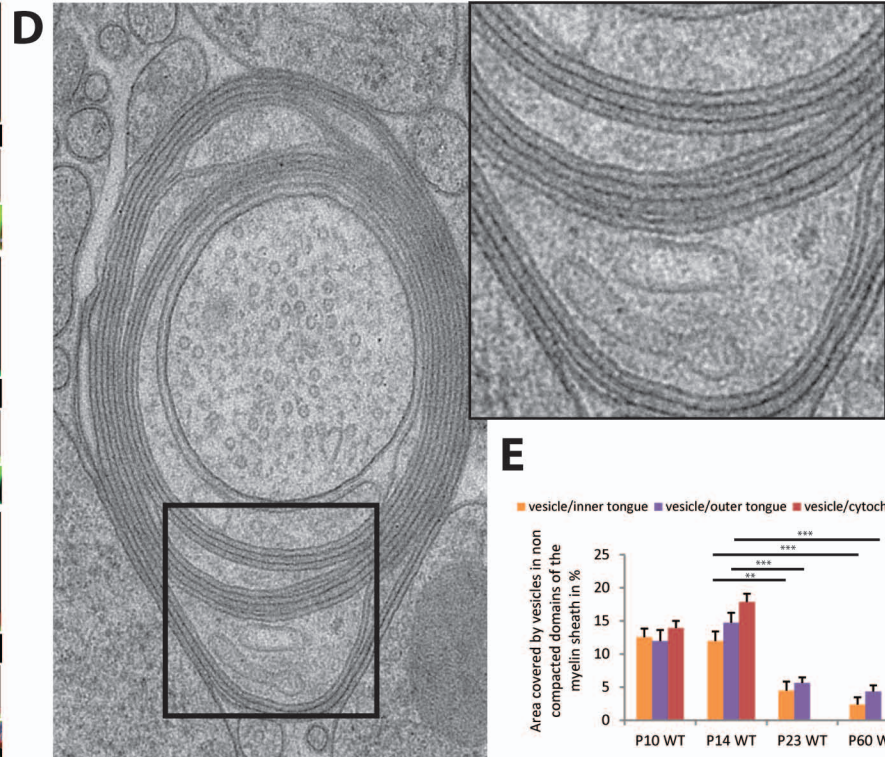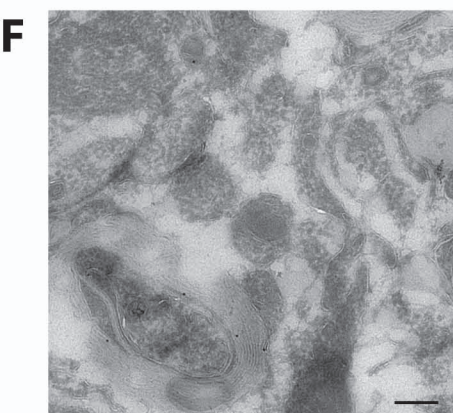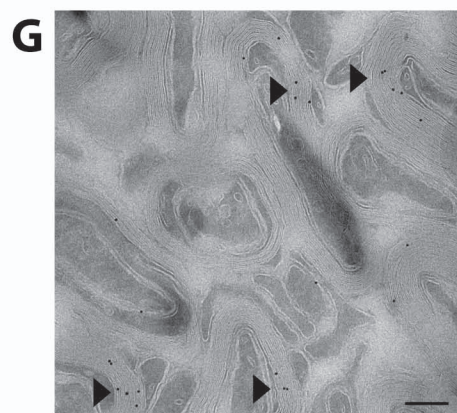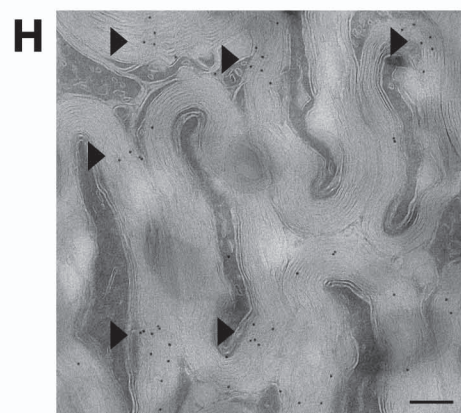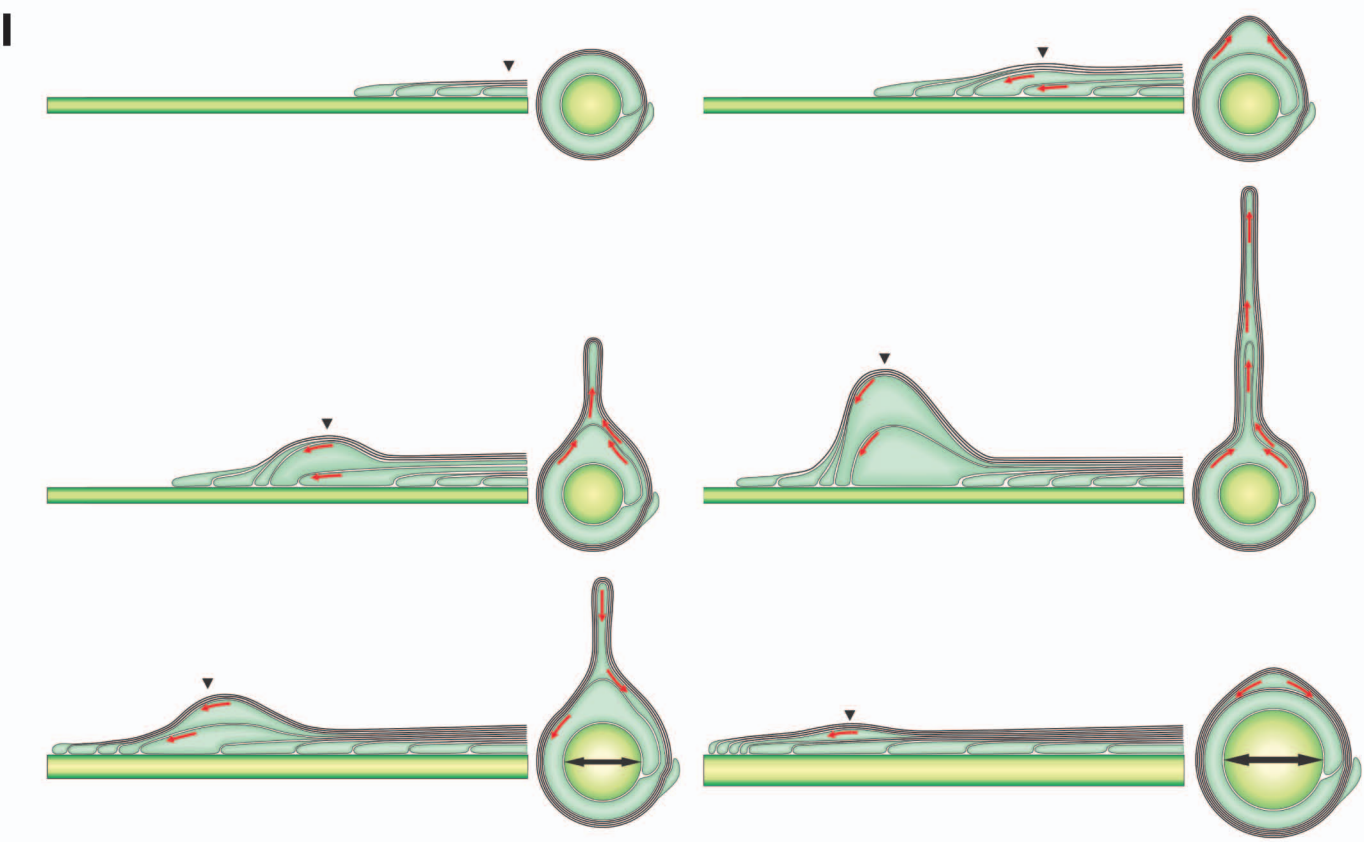



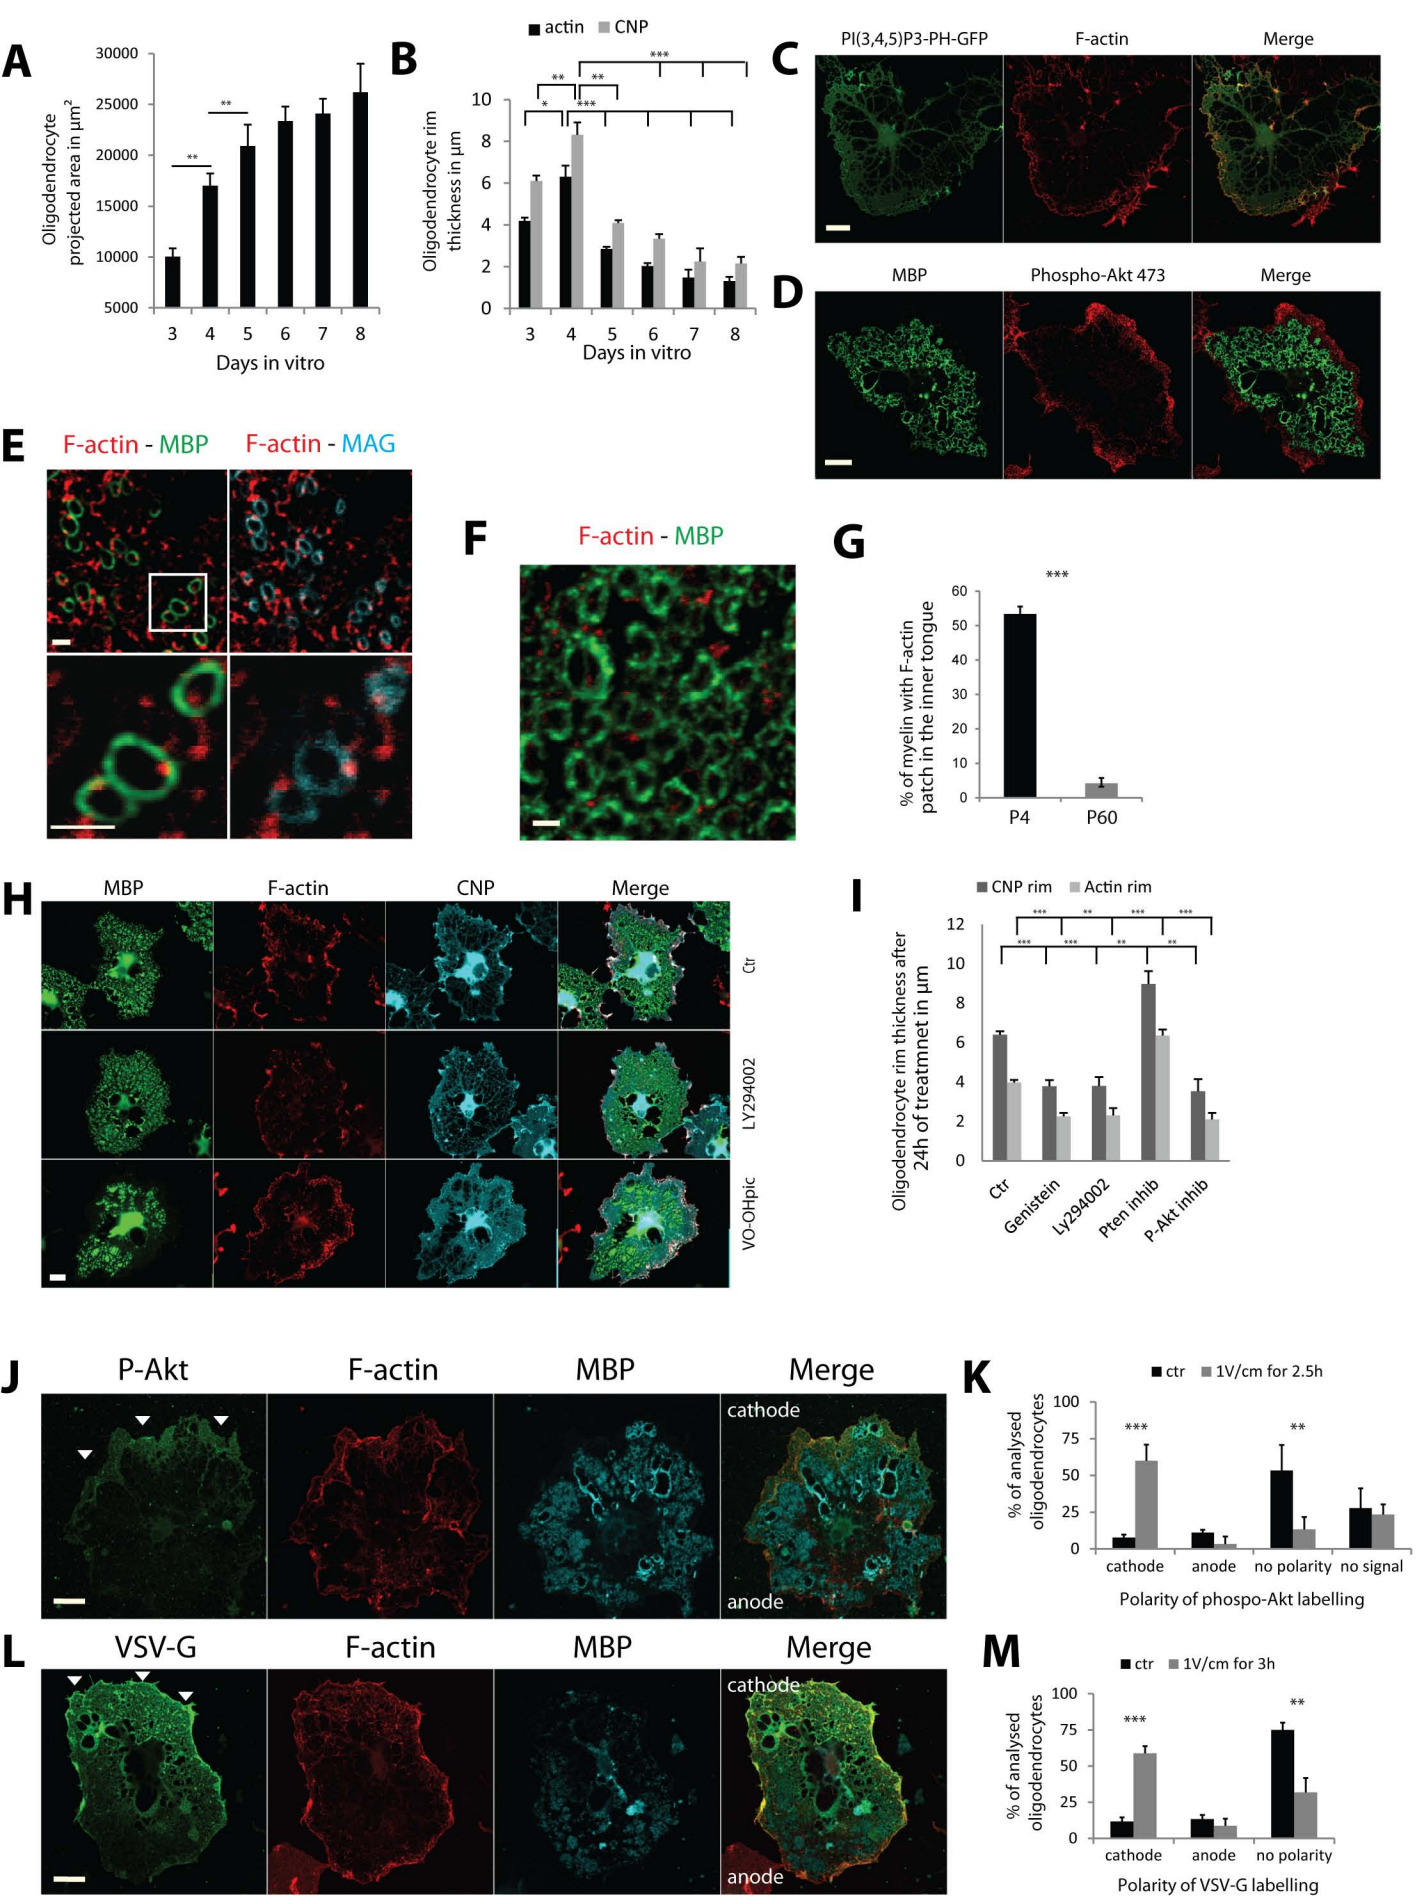

Wild-type P10 Shiverer -/- P10

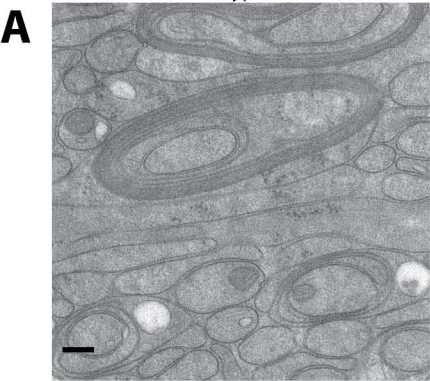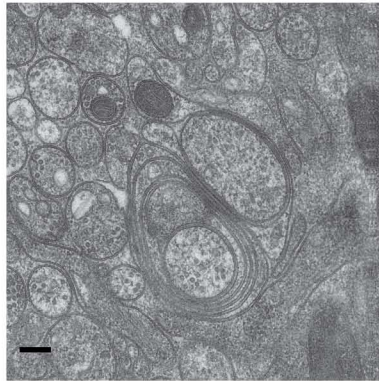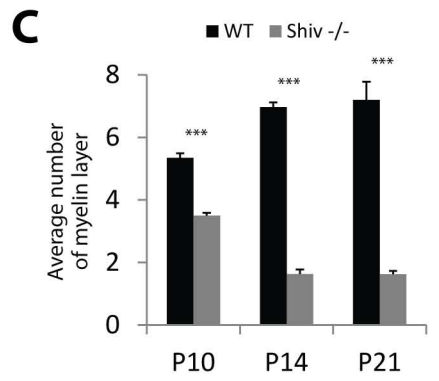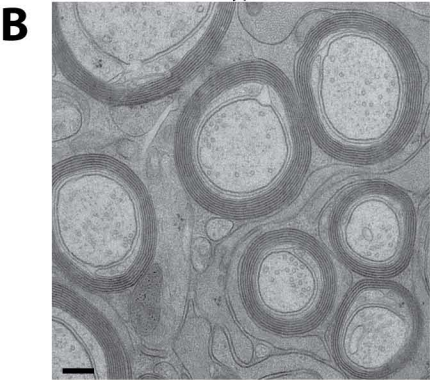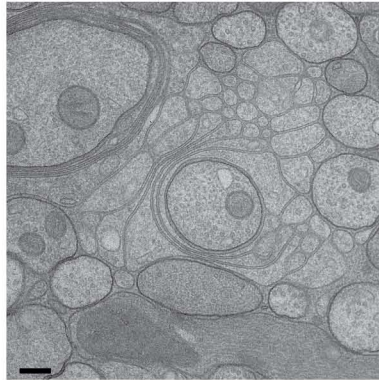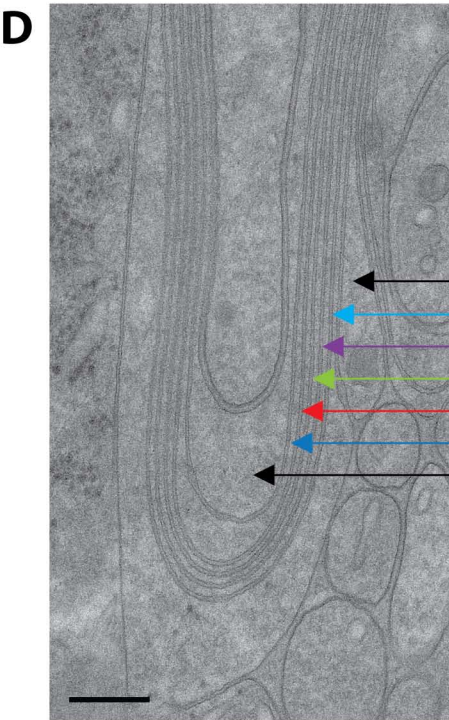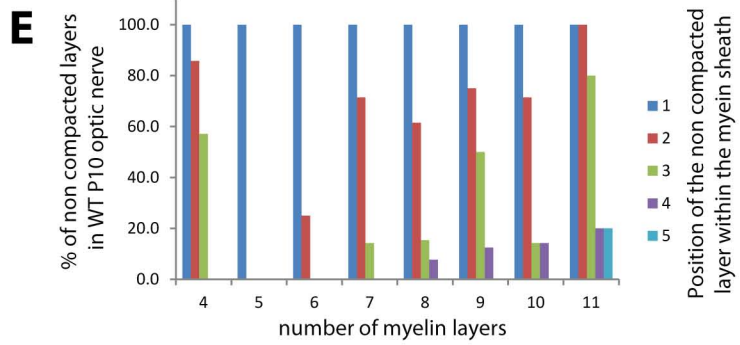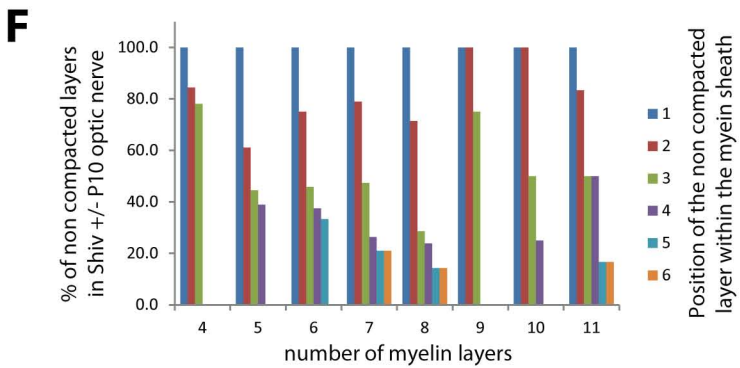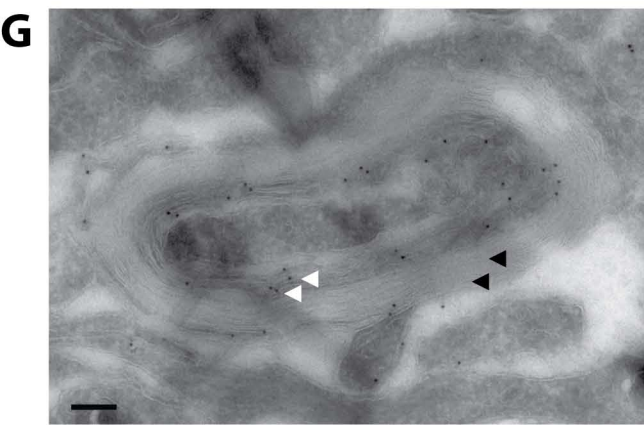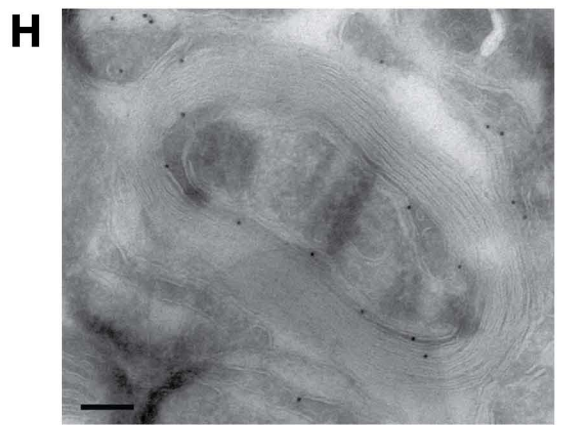



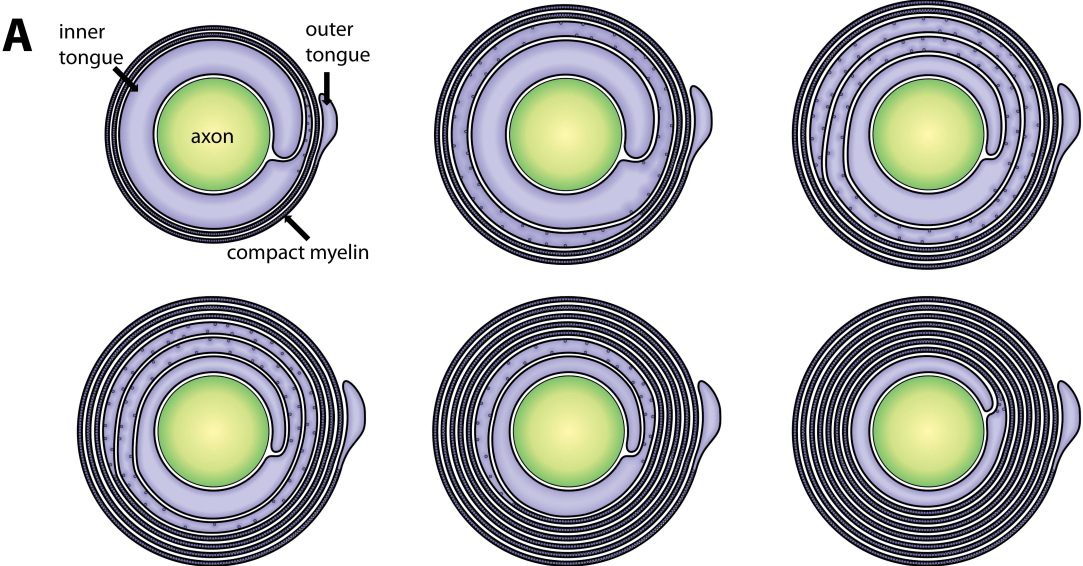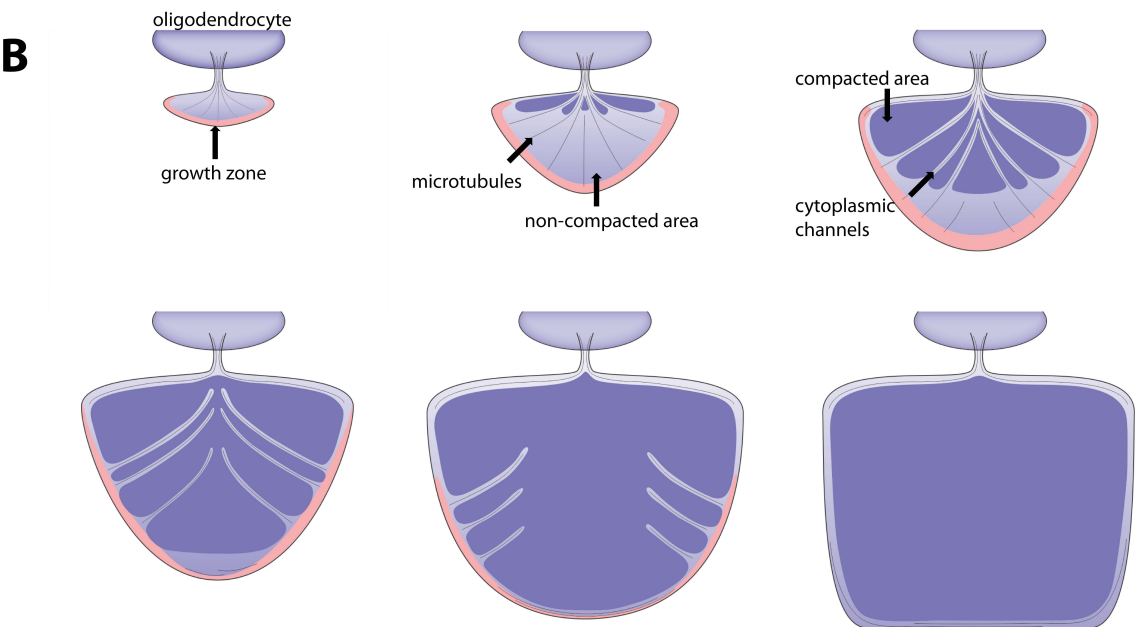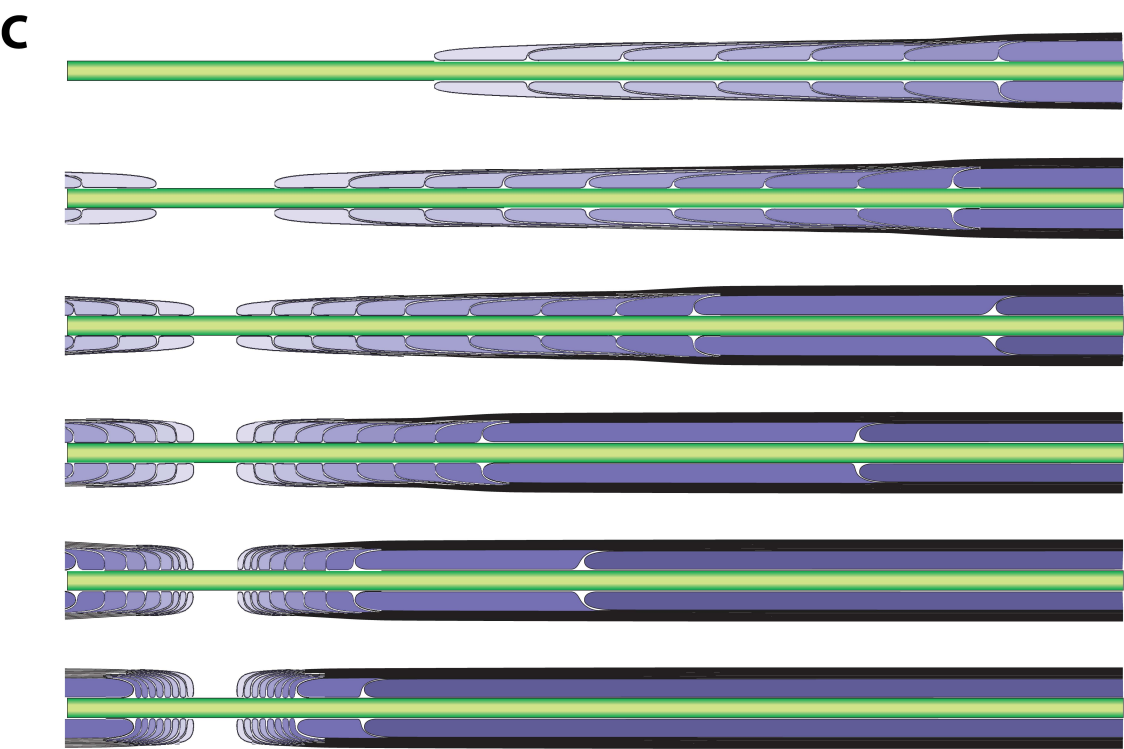

Supplement: NIHMS67675-supplement-Supplementary_Figures.pdf [file NIHMS67675-supplement-Supplementary_Figures.pdf]
